# Supplementary material for: Intermolecular amide and aldehyde interactions: rotational spectroscopy of the complexes of formaldehyde with 2-azetidinone and formamide
Source: Royal Society of Chemistry journal article supplement (doi:10.1039/d2cp04307f), 2022-01-01
Supplement: d2cp04307f1.pdf [file d2cp04307f1.pdf]

## Electronic Supplementary Information

Intermolecular amide and aldehyde interactions: rotational spectroscopy of the complexes of formaldehyde with 2-azetidinone and formamide

Liuting Wang, Tingting Yang, Zhen Wang, Yugao Xu, and Gang Feng\*

School of Chemistry and Chemical Engineering, Chongqing University, Daxuecheng South Rd.  
55, 401331, Chongqing, China

### Contents:

**Table S1.** The spectroscopic parameters, electric dipole moment components, and binding energies ( $E_B$ ) of the three isomers of the 2-azetidinone-H<sub>2</sub>CO complex calculated at the MP2/6-311++G(d,p) and B3LYP-D3(BJ)/def2-TZVP levels of theory.

**Table S2.** The spectroscopic parameters, electric dipole moment components, and binding energies ( $E_B$ ) of the four isomers of the formamide-H<sub>2</sub>CO complex calculated at the MP2/6-311++G(d,p) and B3LYP-D3(BJ)/def2-TZVP levels of theory.

**Table S3.** The results of NBO analysis for 2-azetidinone-H<sub>2</sub>CO.

**Table S4.** The results of NBO analysis for formamide-H<sub>2</sub>CO.

**Table S5.** The results of the SAPT analysis for FM-H<sub>2</sub>O and 2AT-H<sub>2</sub>O<sup>a</sup> complex.

**Table S6.** Experimental transition frequencies of the observed parent species of isomer **A\_I** of the 2-azetidinone-H<sub>2</sub>CO complex.

**Table S7.** Experimental transition frequencies of the observed parent species of isomer **F\_I** of the formamide-H<sub>2</sub>CO complex.

**Figure S1.** Interconversion of different conformations of 2-azetidinone-H<sub>2</sub>CO calculated at the MP2/6-311++G(d,p) level.

**Table S1.** The spectroscopic parameters, electric dipole moment components, and binding energies ( $E_B$ ) of the three isomers of the 2-azetidinone- $H_2CO$  complex calculated at the MP2/6-311++G(d,p) and B3LYP-D3(BJ)/def2-TZVP levels of theory.

| Parameters                         | A-I  |       | A-II |       | A-III |       |
|------------------------------------|------|-------|------|-------|-------|-------|
|                                    | MP2  | B3LYP | MP2  | B3LYP | MP2   | B3LYP |
| $A/\text{MHz}$                     | 4909 | 5011  | 5251 | 5429  | 3733  | 3768  |
| $B/\text{MHz}$                     | 1381 | 1414  | 1513 | 1525  | 1902  | 1818  |
| $C/\text{MHz}$                     | 1093 | 1118  | 1223 | 1230  | 1556  | 1502  |
| $\chi_{aa}/\text{MHz}$             | 2.00 | 2.05  | 1.98 | 2.25  | -3.4  | -3.4  |
| $(\chi_{bb}-\chi_{cc})/\text{MHz}$ | 5.76 | 5.84  | 5.37 | 5.66  | -0.6  | -0.9  |
| $ \mu_a /\text{D}$                 | 0.6  | -0.7  | 1.6  | -2.0  | 0.6   | -0.1  |
| $ \mu_b /\text{D}$                 | -1.4 | -1.4  | -1.0 | -1.0  | -1.9  | -1.8  |
| $ \mu_c /\text{D}$                 | 0.0  | 0.0   | -0.1 | 0.6   | 0.5   | -0.6  |
| $P_{cc}/\text{u}\text{\AA}^2$      | 3.24 | 3.21  | 8.56 | 6.84  | 38.19 | 37.78 |
| $E_B/\text{kJ mol}^{-1}$           | 24.3 | 25.3  | 20.6 | 21.7  | 17.9  | 16.1  |

**Table S2.** The spectroscopic parameters, electric dipole moment components, and binding energies ( $E_B$ ) of the four isomers of the formamide- $H_2CO$  complex calculated at the MP2/6-311++G(d,p) and B3LYP-D3(BJ)/def2-TZVP level of theory.

| Parameters                         | F-I   |       | F-II  |       | F-III |       | F-IV  |       |
|------------------------------------|-------|-------|-------|-------|-------|-------|-------|-------|
|                                    | MP2   | B3LYP | MP2   | B3LYP | MP2   | B3LYP | MP2   | B3LYP |
| $A/\text{MHz}$                     | 8790  | 8872  | 13462 | 13637 | 19315 | 16699 | 8419  | 8755  |
| $B/\text{MHz}$                     | 2459  | 2561  | 2081  | 2168  | 1403  | 1532  | 2660  | 2478  |
| $C/\text{MHz}$                     | 1921  | 1988  | 1825  | 1896  | 1380  | 1466  | 2103  | 2059  |
| $\chi_{aa}/\text{MHz}$             | 1.48  | 1.43  | 2.10  | 2.03  | 1.35  | 1.19  | -3.53 | -3.05 |
| $(\chi_{bb}-\chi_{cc})/\text{MHz}$ | 6.02  | 5.92  | 6.18  | 6.20  | 1.99  | 0.77  | 0.43  | 0.55  |
| $ \mu_a /\text{D}$                 | -0.04 | 0.0   | -2.9  | -3.3  | 5.07  | 4.9   | -0.7  | -0.2  |
| $ \mu_b /\text{D}$                 | 1.40  | -1.5  | 0.5   | 0.6   | -0.4  | -0.5  | -1.7  | -1.8  |
| $ \mu_c /\text{D}$                 | 0.0   | 0.0   | 0.0   | 0.0   | -1.2  | -1.1  | -0.7  | 0.7   |
| $P_{cc}/\text{u}\text{\AA}^2$      | 0.0   | 0.0   | 1.76  | 1.76  | 10.1  | 7.62  | 8.62  | 8.11  |
| $E_B/\text{kJ mol}^{-1}$           | 19.0  | 26.2  | 10.4  | 16.7  | 10.5  | 15.2  | 6.8   | 12.3  |

**Table S3.** The results of NBO analysis for 2-azetidinone-H<sub>2</sub>CO.

| 2-azetidinone-H <sub>2</sub> CO         |                           |                                   |                                         |                      |                                   |
|-----------------------------------------|---------------------------|-----------------------------------|-----------------------------------------|----------------------|-----------------------------------|
| From 2-azetidinone to H <sub>2</sub> CO |                           |                                   | From H <sub>2</sub> CO to 2-azetidinone |                      |                                   |
| Donor NBO <sup>a</sup>                  | Acceptor NBO <sup>b</sup> | <i>E</i> <sup>(2)</sup> /kcal/mol | Donor NBO                               | Acceptor NBO         | <i>E</i> <sup>(2)</sup> /kcal/mol |
| BD(1)C5–C2                              | RY*(4) C12                | 0.07                              | BD(1)C12–H13                            | RY*(8) C2            | 0.05                              |
| BD(1)C5–C2                              | RY*(1) H13                | 0.08                              | BD(1)C12–H14                            | BD*(1) N3–H10        | 0.12                              |
| BD(1)C5–C2                              | BD*(1)C12–H13             | 0.09                              | <b>LP(1)O11</b>                         | <b>BD*(1) N3–H10</b> | <b>1.81</b>                       |
| BD(1)N3–H10                             | BD*(2)C12–O11             | 0.11                              | LP(2)O11                                | RY* (2) H10          | 0.28                              |
| LP(1) O1                                | RY *(4) C12               | 0.09                              | LP(2)O11                                | RY* (3) H10          | 0.14                              |
| LP(1) O1                                | RY *(3) H13               | 0.09                              | LP(2)O11                                | RY* (6) H10          | 0.07                              |
| <b>LP(1) O1</b>                         | <b>BD*(1)C12–H13</b>      | <b>0.35</b>                       | <b>LP(2)O11</b>                         | <b>BD*(1) N3–H10</b> | <b>4.66</b>                       |
| <b>LP(2) O1</b>                         | <b>BD*(1)C12–H13</b>      | <b>1.58</b>                       | LP(2)O11                                | BD*(1) N3–C4         | 0.13                              |

<sup>a</sup>BD for 2-center bond, LP for 1-center valence lone pair the unstarred and starred labels corresponding to Lewis and non-Lewis NBOs, respectively.

<sup>b</sup>RY\* for 1-center Rydberg, and BD\* for 2-center antibond, the unstarred and starred labels corresponding to Lewis and non-Lewis NBOs, respectively.

**Table S4.** The results of NBO analysis for formamide-H<sub>2</sub>CO.

| formamide-H <sub>2</sub> CO         |                           |                                   |                                     |                      |                                   |
|-------------------------------------|---------------------------|-----------------------------------|-------------------------------------|----------------------|-----------------------------------|
| From formamide to H <sub>2</sub> CO |                           |                                   | From H <sub>2</sub> CO to formamide |                      |                                   |
| Donor NBO <sup>a</sup>              | Acceptor NBO <sup>b</sup> | <i>E</i> <sup>(2)</sup> /kcal/mol | Donor NBO                           | Acceptor NBO         | <i>E</i> <sup>(2)</sup> /kcal/mol |
| BD(2)O3–C2                          | RY*(2) H10                | 0.05                              | BD(1)C8–H9                          | RY*(1) H6            | 0.05                              |
| BD(1)C2–H4                          | RY*(6) C8                 | 0.06                              | BD(1)C8–H9                          | BD*(1) N1–H6         | 0.11                              |
| BD(1)C2–H4                          | RY*(7) H10                | 0.06                              | BD(1)C8–H10                         | BD*(2) O3–C2         | 0.06                              |
| BD(1)C2–H4                          | BD*(1)C8–H10              | 0.08                              | LP(1)O7                             | RY* (6) N1           | 0.11                              |
| BD(1)N1–H6                          | RY*(5) O7                 | 0.06                              | <b>LP(1)O7</b>                      | <b>BD* (1) N1–H6</b> | <b>2.11</b>                       |
| BD(1)N1–H6                          | BD*(2)C8–O7               | 0.09                              | LP(2)O7                             | RY* (1) H6           | 0.27                              |
| LP(1)O3                             | RY*(5) H10                | 0.07                              | LP(2)O7                             | RY* (3) H6           | 0.08                              |
| <b>LP(1)O3</b>                      | <b>BD*(1) C8–H10</b>      | <b>0.85</b>                       | LP(2)O7                             | RY* (4) H6           | 0.07                              |
| LP(2)O3                             | RY*(3) C8                 | 0.08                              | <b>LP(2)O7</b>                      | <b>BD* (1) N1–H6</b> | <b>6.36</b>                       |
| LP(2)O3                             | BD*(1) C8–H9              | 0.12                              |                                     |                      |                                   |
| <b>LP(2)O3</b>                      | <b>BD*(1) C8–H10</b>      | <b>1.68</b>                       |                                     |                      |                                   |

<sup>a</sup>BD for 2-center bond, LP for 1-center valence lone pair the unstarred and starred labels corresponding to Lewis and non-Lewis NBOs, respectively.

<sup>b</sup>RY\* for 1-center Rydberg, and BD\* for 2-center antibond, the unstarred and starred labels corresponding to Lewis and non-Lewis NBOs, respectively.

**Table S5.** The results of the SAPT analysis for FM-H<sub>2</sub>O and 2AT-H<sub>2</sub>O<sup>a</sup> complex.

| Complexes            |          | $E_{elec}$ | $E_{ind}$ | $E_{disp}$ | $E_{exch}$ | $E_t$ |
|----------------------|----------|------------|-----------|------------|------------|-------|
| FM-H <sub>2</sub> O  | <b>a</b> | -66.6      | -21.4     | -22.0      | 69.2       | -40.9 |
|                      | <b>b</b> | -41.9      | -14.0     | -14.7      | 41.6       | -29.1 |
|                      | <b>c</b> | -23.6      | -7.9      | -5.7       | 20.7       | -16.5 |
| 2AT-H <sub>2</sub> O | <b>a</b> | -59.8      | -18.9     | -21.7      | 60.1       | -40.3 |
|                      | <b>b</b> | -44.6      | -15.1     | -17.8      | 45.1       | -32.3 |

<sup>a</sup> All values are given in kJ mol<sup>-1</sup>.

**Table S6.** Experimental transition frequencies of the observed parent species of isomer **A-I** of the 2-azetidinone-H<sub>2</sub>CO complex.

| $J'$ | $K_a'$ | $K_c'$ | $F'$ | $J''$ | $K_a''$ | $K_c''$ | $F''$ | $\nu_{\text{obs}}/\text{MHz}$ | $\Delta\nu_{\text{obs-calc}} (\text{MHz})$ |
|------|--------|--------|------|-------|---------|---------|-------|-------------------------------|--------------------------------------------|
| 2    | 1      | 2      | 3    | 1     | 0       | 1       | 2     | 8329.3656                     | 0.0016                                     |
| 2    | 1      | 2      | 1    | 1     | 0       | 1       | 0     | 8329.5567                     | 0.0000                                     |
| 5    | 0      | 5      | 5    | 4     | 1       | 4       | 4     | 9668.5985                     | 0.0031                                     |
| 5    | 0      | 5      | 6    | 4     | 1       | 4       | 5     | 9669.0154                     | 0.0005                                     |
| 5    | 0      | 5      | 4    | 4     | 1       | 4       | 3     | 9669.1866                     | 0.0034                                     |
| 3    | 1      | 3      | 2    | 2     | 0       | 2       | 1     | 10405.5802                    | -0.0021                                    |
| 3    | 1      | 3      | 3    | 2     | 0       | 2       | 2     | 10406.4432                    | -0.0039                                    |
| 4    | 1      | 4      | 3    | 3     | 0       | 3       | 2     | 12365.9950                    | -0.0047                                    |
| 4    | 1      | 4      | 5    | 3     | 0       | 3       | 4     | 12366.1169                    | 0.0007                                     |
| 4    | 1      | 4      | 4    | 3     | 0       | 3       | 3     | 12366.8604                    | -0.0006                                    |
| 6    | 0      | 6      | 6    | 5     | 1       | 5       | 5     | 12429.5189                    | -0.0031                                    |
| 6    | 0      | 6      | 7    | 5     | 1       | 5       | 6     | 12429.8516                    | -0.0044                                    |
| 6    | 0      | 6      | 5    | 5     | 1       | 5       | 4     | 12429.9727                    | 0.0030                                     |
| 4    | 2      | 3      | 4    | 4     | 1       | 4       | 4     | 12739.9180                    | -0.0002                                    |
| 4    | 2      | 3      | 5    | 4     | 1       | 4       | 5     | 12741.1968                    | 0.0021                                     |
| 5    | 1      | 5      | 4    | 4     | 0       | 4       | 3     | 14243.8376                    | 0.0017                                     |
| 5    | 1      | 5      | 6    | 4     | 0       | 4       | 5     | 14243.9225                    | -0.0017                                    |
| 5    | 1      | 5      | 5    | 4     | 0       | 4       | 4     | 14244.6108                    | -0.0001                                    |
| 7    | 0      | 7      | 7    | 6     | 1       | 6       | 6     | 15123.6681                    | -0.0013                                    |
| 7    | 0      | 7      | 8    | 6     | 1       | 6       | 7     | 15123.9081                    | -0.0013                                    |
| 7    | 0      | 7      | 6    | 6     | 1       | 6       | 5     | 15123.9842                    | -0.0028                                    |
| 2    | 2      | 1      | 1    | 1     | 1       | 0       | 0     | 16132.2168                    | 0.0000                                     |
| 2    | 2      | 1      | 2    | 1     | 1       | 0       | 2     | 16132.9398                    | -0.0027                                    |
| 2    | 2      | 1      | 3    | 1     | 1       | 0       | 2     | 16133.5565                    | -0.0001                                    |
| 2    | 2      | 1      | 2    | 1     | 1       | 0       | 1     | 16134.0633                    | 0.0001                                     |
| 2    | 2      | 1      | 1    | 1     | 1       | 0       | 1     | 16135.0192                    | 0.0004                                     |
| 6    | 1      | 6      | 5    | 5     | 0       | 5       | 4     | 16080.6267                    | 0.0005                                     |
| 6    | 1      | 6      | 7    | 5     | 0       | 5       | 6     | 16080.6945                    | 0.0076                                     |
| 6    | 1      | 6      | 6    | 5     | 0       | 5       | 5     | 16081.2822                    | 0.0011                                     |
| 2    | 2      | 0      | 2    | 1     | 1       | 1       | 1     | 16436.6608                    | -0.0001                                    |
| 2    | 2      | 0      | 2    | 1     | 1       | 1       | 2     | 16437.2060                    | -0.0021                                    |
| 2    | 2      | 0      | 1    | 1     | 1       | 1       | 1     | 16437.7159                    | -0.0046                                    |
| 2    | 2      | 0      | 3    | 1     | 1       | 1       | 2     | 16437.8984                    | 0.0091                                     |
| 2    | 2      | 0      | 1    | 1     | 1       | 1       | 0     | 16439.0866                    | -0.0023                                    |
| 8    | 0      | 8      | 8    | 7     | 1       | 7       | 7     | 17732.4869                    | 0.0026                                     |
| 8    | 0      | 8      | 9    | 7     | 1       | 7       | 8     | 17732.6362                    | -0.0045                                    |
| 8    | 0      | 8      | 7    | 7     | 1       | 7       | 6     | 17732.6918                    | -0.0016                                    |

|   |   |   |   |   |   |   |   |            |         |
|---|---|---|---|---|---|---|---|------------|---------|
| 7 | 1 | 7 | 6 | 6 | 0 | 6 | 5 | 17918.8949 | 0.0008  |
| 7 | 1 | 7 | 8 | 6 | 0 | 6 | 7 | 17918.9292 | -0.0023 |
| 7 | 1 | 7 | 7 | 6 | 0 | 6 | 6 | 17919.4148 | -0.0031 |
| 3 | 2 | 2 | 2 | 2 | 1 | 1 | 1 | 18346.7728 | -0.0025 |
| 3 | 2 | 2 | 4 | 2 | 1 | 1 | 3 | 18347.0982 | -0.0033 |
| 3 | 2 | 1 | 3 | 2 | 1 | 2 | 2 | 19290.8877 | 0.0000  |
| 3 | 2 | 1 | 4 | 2 | 1 | 2 | 3 | 19292.2697 | 0.0095  |
| 3 | 2 | 1 | 2 | 2 | 1 | 2 | 1 | 19292.9846 | -0.0030 |
| 4 | 1 | 4 | 5 | 3 | 1 | 3 | 4 | 9398.6341  | 0.0003  |
| 4 | 1 | 4 | 3 | 3 | 1 | 3 | 2 | 9398.7321  | -0.0010 |
| 4 | 1 | 4 | 4 | 3 | 1 | 3 | 3 | 9398.7627  | 0.0005  |
| 4 | 0 | 4 | 5 | 3 | 0 | 3 | 4 | 9843.3628  | -0.0019 |
| 4 | 0 | 4 | 3 | 3 | 0 | 3 | 2 | 9843.4019  | 0.0014  |
| 4 | 0 | 4 | 4 | 3 | 0 | 3 | 3 | 9843.5092  | -0.0083 |
| 4 | 1 | 3 | 3 | 3 | 1 | 2 | 2 | 10545.2495 | 0.0008  |
| 4 | 1 | 3 | 5 | 3 | 1 | 2 | 4 | 10545.3114 | -0.0007 |
| 4 | 1 | 3 | 4 | 3 | 1 | 2 | 3 | 10545.4002 | -0.0042 |
| 5 | 1 | 5 | 6 | 4 | 1 | 4 | 5 | 11721.1740 | 0.0012  |
| 5 | 1 | 5 | 4 | 4 | 1 | 4 | 3 | 11721.2401 | 0.0035  |
| 5 | 1 | 5 | 5 | 4 | 1 | 4 | 4 | 11721.2667 | -0.0008 |
| 5 | 0 | 5 | 6 | 4 | 0 | 4 | 5 | 12191.7660 | -0.0003 |
| 5 | 0 | 5 | 4 | 4 | 0 | 4 | 3 | 12191.7931 | 0.0106  |
| 5 | 0 | 5 | 5 | 4 | 0 | 4 | 4 | 12191.9370 | -0.0018 |
| 5 | 2 | 4 | 4 | 4 | 2 | 3 | 3 | 12469.4236 | -0.0023 |
| 5 | 2 | 4 | 6 | 4 | 2 | 3 | 5 | 12469.4448 | 0.0003  |
| 5 | 2 | 4 | 5 | 4 | 2 | 3 | 4 | 12469.6037 | -0.0037 |
| 5 | 2 | 3 | 4 | 4 | 2 | 2 | 3 | 12783.7634 | -0.0001 |
| 5 | 2 | 3 | 6 | 4 | 2 | 2 | 5 | 12783.7634 | -0.0020 |
| 5 | 2 | 3 | 5 | 4 | 2 | 2 | 4 | 12783.7634 | -0.0027 |
| 5 | 1 | 4 | 4 | 4 | 1 | 3 | 3 | 13146.5092 | -0.0006 |
| 5 | 1 | 4 | 6 | 4 | 1 | 3 | 5 | 13146.5416 | -0.0022 |
| 5 | 1 | 4 | 5 | 4 | 1 | 3 | 4 | 13146.6259 | 0.0030  |
| 6 | 1 | 6 | 7 | 5 | 1 | 5 | 6 | 14028.5292 | 0.0003  |
| 6 | 1 | 6 | 5 | 5 | 1 | 5 | 4 | 14028.5721 | -0.0007 |
| 6 | 1 | 6 | 6 | 5 | 1 | 5 | 5 | 14028.6090 | 0.0000  |
| 6 | 0 | 6 | 7 | 5 | 0 | 5 | 6 | 14482.0135 | -0.0005 |
| 6 | 0 | 6 | 5 | 5 | 0 | 5 | 4 | 14482.0287 | 0.0056  |
| 6 | 0 | 6 | 6 | 5 | 0 | 5 | 5 | 14482.1937 | -0.0004 |
| 6 | 2 | 5 | 5 | 5 | 2 | 4 | 4 | 14933.1856 | -0.0006 |
| 6 | 2 | 5 | 7 | 5 | 2 | 4 | 6 | 14933.1856 | -0.0044 |
| 6 | 2 | 5 | 6 | 5 | 2 | 4 | 5 | 14933.3036 | -0.0016 |

|   |   |   |   |   |   |   |   |            |         |
|---|---|---|---|---|---|---|---|------------|---------|
| 6 | 3 | 4 | 6 | 5 | 3 | 3 | 5 | 15081.9870 | 0.0011  |
| 6 | 2 | 4 | 6 | 5 | 2 | 3 | 5 | 15457.8327 | -0.0011 |
| 6 | 2 | 4 | 7 | 5 | 2 | 3 | 6 | 15457.8887 | -0.0018 |
| 6 | 2 | 4 | 5 | 5 | 2 | 3 | 4 | 15457.8974 | -0.0015 |
| 6 | 1 | 5 | 5 | 5 | 1 | 4 | 4 | 15721.0570 | 0.0076  |
| 6 | 1 | 5 | 7 | 5 | 1 | 4 | 6 | 15721.0750 | 0.0027  |
| 6 | 1 | 5 | 6 | 5 | 1 | 4 | 5 | 15721.1589 | 0.0034  |
| 7 | 1 | 7 | 8 | 6 | 1 | 6 | 7 | 16320.2595 | 0.0006  |
| 7 | 1 | 7 | 6 | 6 | 1 | 6 | 5 | 16320.2962 | 0.0052  |
| 7 | 1 | 7 | 7 | 6 | 1 | 6 | 6 | 16320.3309 | -0.0001 |
| 7 | 0 | 7 | 8 | 6 | 0 | 6 | 7 | 16722.5789 | -0.0033 |
| 7 | 0 | 7 | 6 | 6 | 0 | 6 | 5 | 16722.5899 | -0.0002 |
| 7 | 0 | 7 | 7 | 6 | 0 | 6 | 6 | 16722.7592 | 0.0028  |

**Table S7.** Experimental transition frequencies of the observed parent species of isomer **F-I** of the formamide-H<sub>2</sub>CO complex.

| $J'$  | $K_a'$ | $K_c'$ | $F'$ | $J''$ | $K_a''$ | $K_c''$ | $F''$ | $\nu_{\text{obs}}/\text{MHz}$ | $\Delta\nu_{\text{obs-calc}} (\text{MHz})$ |
|-------|--------|--------|------|-------|---------|---------|-------|-------------------------------|--------------------------------------------|
| 1     | 1      | 0      | 1    | 1     | 0       | 1       | 1     | 6892.4102                     | 0.0061                                     |
| 1     | 1      | 0      | 1    | 1     | 0       | 1       | 2     | 6892.7992                     | 0.0030                                     |
| 1     | 1      | 0      | 2    | 1     | 0       | 1       | 1     | 6893.4102                     | -0.0024                                    |
| 1     | 1      | 0      | 2    | 1     | 0       | 1       | 2     | 6893.8006                     | -0.0042                                    |
| ----- |        |        |      |       |         |         |       |                               |                                            |
| 2     | 1      | 1      | 2    | 2     | 0       | 2       | 2     | 7480.1637                     | 0.0041                                     |
| 2     | 1      | 1      | 2    | 2     | 0       | 2       | 3     | 7480.6490                     | -0.0021                                    |
| 2     | 1      | 1      | 3    | 2     | 0       | 2       | 2     | 7480.8080                     | -0.0120                                    |
| 2     | 1      | 1      | 2    | 2     | 0       | 2       | 1     | 7480.9137                     | -0.0105                                    |
| 2     | 1      | 1      | 1    | 2     | 0       | 2       | 1     | 7481.1834                     | -0.0037                                    |
| 2     | 1      | 1      | 3    | 2     | 0       | 2       | 2     | 7481.3155                     | 0.0038                                     |
| 2     | 1      | 1      | 1    | 2     | 0       | 2       | 3     | 7481.9594                     | 0.0075                                     |
| ----- |        |        |      |       |         |         |       |                               |                                            |
| 3     | 0      | 3      | 3    | 2     | 1       | 2       | 2     | 7414.5199                     | 0.0000                                     |
| 3     | 0      | 3      | 4    | 2     | 1       | 2       | 3     | 7414.9832                     | 0.0017                                     |
| 3     | 0      | 3      | 2    | 2     | 1       | 2       | 1     | 7415.3657                     | 0.0006                                     |
| ----- |        |        |      |       |         |         |       |                               |                                            |
| 3     | 1      | 2      | 3    | 3     | 0       | 3       | 3     | 8424.6428                     | 0.0010                                     |
| 3     | 1      | 2      | 4    | 3     | 0       | 3       | 4     | 8425.8126                     | 0.0000                                     |
| 3     | 1      | 2      | 2    | 3     | 0       | 3       | 2     | 8426.2286                     | 0.0060                                     |
| ----- |        |        |      |       |         |         |       |                               |                                            |
| 4     | 1      | 3      | 4    | 4     | 0       | 4       | 4     | 9794.9728                     | 0.0041                                     |
| 4     | 1      | 3      | 5    | 4     | 0       | 4       | 5     | 9796.2191                     | -0.0049                                    |
| 4     | 1      | 3      | 3    | 4     | 0       | 4       | 3     | 9796.5494                     | 0.0023                                     |
| ----- |        |        |      |       |         |         |       |                               |                                            |
| 1     | 1      | 1      | 0    | 0     | 0       | 0       | 1     | 10797.8607                    | 0.0017                                     |
| 1     | 1      | 1      | 2    | 0     | 0       | 0       | 1     | 10798.7813                    | -0.0017                                    |
| 1     | 1      | 1      | 1    | 0     | 0       | 0       | 1     | 10799.3965                    | -0.0001                                    |
| ----- |        |        |      |       |         |         |       |                               |                                            |
| 5     | 1      | 4      | 5    | 5     | 0       | 5       | 5     | 11665.2930                    | -0.0030                                    |
| 5     | 1      | 4      | 6    | 5     | 0       | 5       | 6     | 11666.6568                    | -0.0006                                    |
| 5     | 1      | 4      | 4    | 5     | 0       | 5       | 4     | 11666.9370                    | 0.0022                                     |
| ----- |        |        |      |       |         |         |       |                               |                                            |
| 4     | 0      | 4      | 4    | 3     | 1       | 3       | 3     | 12384.7645                    | 0.0000                                     |
| 4     | 0      | 4      | 5    | 3     | 1       | 3       | 4     | 12385.2356                    | -0.0053                                    |
| 4     | 0      | 4      | 3    | 3     | 1       | 3       | 2     | 12385.4780                    | -0.0001                                    |
| ----- |        |        |      |       |         |         |       |                               |                                            |
| 2     | 1      | 2      | 1    | 1     | 0       | 1       | 1     | 14702.9086                    | 0.0005                                     |
| 2     | 1      | 2      | 1    | 1     | 0       | 1       | 0     | 14703.8839                    | 0.0076                                     |
| 2     | 1      | 2      | 3    | 1     | 0       | 1       | 2     | 14703.9042                    | 0.0011                                     |
| 2     | 1      | 2      | 2    | 1     | 0       | 1       | 1     | 14704.5970                    | 0.0086                                     |
| 2     | 1      | 2      | 2    | 1     | 0       | 1       | 2     | 14704.9825                    | 0.0020                                     |
| ----- |        |        |      |       |         |         |       |                               |                                            |
| 5     | 2      | 3      | 4    | 5     | 1       | 4       | 4     | 17025.3241                    | -0.0027                                    |
| 5     | 2      | 3      | 6    | 5     | 1       | 4       | 6     | 17025.3777                    | 0.0044                                     |
| 5     | 2      | 3      | 5    | 5     | 1       | 4       | 5     | 17025.5992                    | -0.0021                                    |



|   |   |   |   |   |   |   |   |            |         |
|---|---|---|---|---|---|---|---|------------|---------|
| 4 | 2 | 2 | 3 | 4 | 1 | 3 | 3 | 17664.6516 | 0.0018  |
| 4 | 2 | 2 | 5 | 4 | 1 | 3 | 5 | 17664.7374 | -0.0015 |
| 4 | 2 | 2 | 4 | 4 | 1 | 3 | 4 | 17665.0849 | -0.0002 |
| 5 | 0 | 5 | 5 | 4 | 1 | 4 | 4 | 17359.2128 | 0.0019  |
| 5 | 0 | 5 | 6 | 4 | 1 | 4 | 5 | 17359.6166 | 0.0001  |
| 5 | 0 | 5 | 4 | 4 | 1 | 4 | 3 | 17359.7733 | 0.0017  |
| 3 | 2 | 1 | 2 | 3 | 1 | 2 | 2 | 18386.2821 | -0.0022 |
| 3 | 2 | 1 | 4 | 3 | 1 | 2 | 4 | 18386.4175 | 0.0042  |
| 3 | 2 | 1 | 3 | 3 | 1 | 2 | 3 | 18386.7813 | -0.0004 |
| 3 | 1 | 3 | 2 | 2 | 0 | 2 | 1 | 18345.9108 | -0.0019 |
| 3 | 1 | 3 | 4 | 2 | 0 | 2 | 3 | 18346.0762 | -0.0015 |
| 3 | 1 | 3 | 3 | 2 | 0 | 2 | 2 | 18346.8346 | -0.0033 |
| 4 | 0 | 4 | 5 | 3 | 0 | 3 | 4 | 9843.3628  | -0.0019 |
| 4 | 0 | 4 | 3 | 3 | 0 | 3 | 2 | 9843.4019  | 0.0014  |
| 4 | 0 | 4 | 4 | 3 | 0 | 3 | 3 | 9843.5092  | -0.0083 |
| 2 | 2 | 0 | 3 | 2 | 1 | 1 | 3 | 19056.3568 | 0.0040  |
| 2 | 2 | 0 | 2 | 2 | 1 | 1 | 2 | 19056.5164 | -0.0053 |

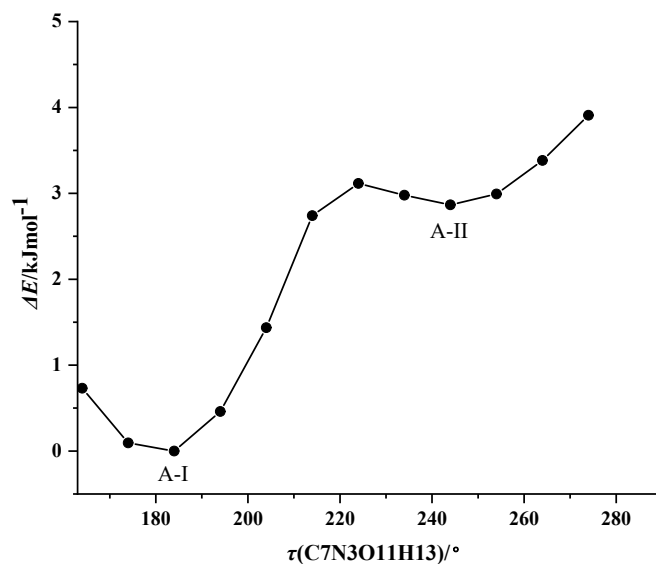

**Figure S1.** Potential energy curve relating to the interconversion of different conformations of 2-azetidinone- $\text{H}_2\text{CO}$  calculated at the MP2/6-311++G(d,p) level.
